# Supplementary material for: Transient DNMT3L Expression Reinforces Chromatin Surveillance to Halt Senescence Progression in Mouse Embryonic Fibroblast
Source: PubMed Central journal article supplement (PMC7064442; doi:10.3389/fcell.2020.00103), 2020-03-04
Supplement: Table_1.pdf [file Table_1.pdf]

**Table S1.** TE subfamilies showing differential expression between *Dnmt3l* *-/-* and *Dnmt3l* *+/+* littermate-derived MEFs. The expression quantity is indicated as transcript per million reads (tpm) according to previously published strand-specific RNA sequencing results. The sequences have been deposited in the NCBI GEO dataset under accession number GSE69007.

| Differentially expressed TEs | Dnmt3l <i>+/+</i> MEF replicate 1 (tpm) | Dnmt3l <i>+/+</i> MEF replicate 2 (tpm) | Dnmt3l <i>-/-</i> MEF replicate 1 (tpm) | Dnmt3l <i>-/-</i> MEF replicate 2 (tpm) | <i>p</i> value |
|------------------------------|-----------------------------------------|-----------------------------------------|-----------------------------------------|-----------------------------------------|----------------|
| LTR/ERVK:RLTR31D_MM          | 333.784                                 | 370.379                                 | 508.313                                 | 466.997                                 | 0.02008459     |
| LTR/ERV1:RLTR4_Mm            | 147.444                                 | 162.873                                 | 214.387                                 | 235.817                                 | 0.020674749    |
| DNA/TcMar:X4b_DNA            | 107.633                                 | 164.962                                 | 280.231                                 | 231.739                                 | 0.044483942    |
| LTR/ERVL-MaLR:ORR1A3         | 129.068                                 | 146.372                                 | 194.55                                  | 206.059                                 | 0.018210771    |
| LTR/ERV1:RLTR6C_Mm           | 122.123                                 | 134.683                                 | 161.163                                 | 169.223                                 | 0.026445141    |
| LTR/ERVK:MurERV4-int         | 97.537                                  | 107.926                                 | 130.687                                 | 125.79                                  | 0.042119698    |
| LTR/ERVK:RMER17C2            | 89.012                                  | 80.467                                  | 125.116                                 | 112.879                                 | 0.027248853    |
| LINE/L1:L1MdTf_II            | 48.887                                  | 53.296                                  | 66.15                                   | 72.479                                  | 0.0260158      |
| LINE/L1:L1MdGf_II            | 29.179                                  | 31.898                                  | 42.694                                  | 47.529                                  | 0.02777258     |
| DNA/hAT-Blackjack:MER81      | 30.145                                  | 27.307                                  | 36.475                                  | 40.492                                  | 0.034413192    |
| DNA/hAT-Charlie:MER58D       | 21.705                                  | 23.567                                  | 32.146                                  | 35.512                                  | 0.024260586    |
| LTR/ERV1:RLTR30D2_MM         | 17.217                                  | 21.724                                  | 33.107                                  | 27.864                                  | 0.044245715    |
| LINE/L2:X15_LINE             | 13.57                                   | 18.357                                  | 30.307                                  | 26.501                                  | 0.030105904    |
| LINE/CR1:X17_LINE            | 20.65                                   | 22.371                                  | 27.497                                  | 26.481                                  | 0.02458434     |
| LTR/ERVK:RMER17A             | 17.659                                  | 19.92                                   | 24.624                                  | 26.066                                  | 0.026990023    |
| LTR/ERV1:RLTR14_RN           | 18.138                                  | 19.825                                  | 27.174                                  | 25.076                                  | 0.018549331    |
| LINE/L1:L1MdF_II             | 17.669                                  | 19.821                                  | 22.209                                  | 24.365                                  | 0.048228577    |
| LINE/L1:L1M                  | 14.3                                    | 16.713                                  | 21.711                                  | 22.803                                  | 0.036255343    |
| DNA/hAT-Charlie:Charlie10    | 16.326                                  | 15.905                                  | 22.577                                  | 21.59                                   | 0.013544301    |
| LTR/ERV1:LTR37A              | 12.142                                  | 14.578                                  | 18.947                                  | 21.297                                  | 0.028714823    |
| LINE/RTE-X:L4_B_Mam          | 14.844                                  | 14.249                                  | 19.238                                  | 20.361                                  | 0.015158771    |
| LTR/ERVK:RLTR16B_MM          | 11.073                                  | 11.118                                  | 17.155                                  | 18.192                                  | 0.024841149    |

|                            |        |        |        |        |             |
|----------------------------|--------|--------|--------|--------|-------------|
| LTR/Gypsy:MamGypLTR1b      | 9.767  | 11.765 | 19.927 | 17.588 | 0.018461026 |
| LTR/ERVK:RLTR20A           | 11.07  | 9.497  | 16.163 | 17.301 | 0.013828051 |
| LTR/ERVK:ETnERV2-int       | 11.059 | 12.627 | 16.749 | 17.094 | 0.042596592 |
| LTR/ERVL-MaLR:MTE2b-int    | 8.172  | 9.972  | 14.598 | 14.833 | 0.047997039 |
| LTR/ERVK:RLTR9A3           | 11.409 | 11.222 | 12.177 | 12.616 | 0.044535423 |
| LTR/ERVK:RLTR16C_MM        | 8.235  | 8.308  | 13.028 | 12.433 | 0.019815904 |
| DNA/TcMar-Tigger:Tigger20a | 7.702  | 7.315  | 10.616 | 10.438 | 0.008687081 |
| LTR/ERV1:LTRIS_Mm          | 6.731  | 7.923  | 10.444 | 9.321  | 0.044776647 |
| DNA/hAT-Tip100:MER45C      | 5.943  | 5.099  | 8.328  | 9.074  | 0.015494942 |
| DNA/hAT-Tip100:Zaphod      | 6.384  | 6.398  | 8.321  | 8.973  | 0.045617176 |
| DNA/hAT-Charlie:Charlie11  | 4.983  | 5.741  | 7.356  | 8.471  | 0.038408336 |
| DNA/hAT-Tip100:MamTip3     | 4.678  | 5.334  | 6.612  | 7.467  | 0.03513994  |
| DNA/hAT-Blackjack:MER94B   | 5.386  | 4.745  | 7.635  | 7.452  | 0.031926614 |
| DNA/hAT-Charlie:Charlie31a | 4.439  | 4.43   | 6.63   | 7.262  | 0.039814232 |
| LTR/ERVK:RLTR10B2          | 5.731  | 5.367  | 6.241  | 6.705  | 0.047449442 |
| LINE/L1:L1MEj              | 3.991  | 4.345  | 6.296  | 6.678  | 0.006299328 |
| LTR/ERVL:MER76             | 3.912  | 3.464  | 5.329  | 5.866  | 0.017105527 |
| DNA:Eutr11                 | 2.59   | 3.141  | 6.116  | 5.698  | 0.007834686 |
| LTR/ERVL-MaLR:MLT1B-int    | 4.177  | 3.615  | 5.623  | 5.425  | 0.040362808 |
| LTR/Gypsy:MamGypLTR4       | 2.982  | 4.103  | 6.152  | 5.424  | 0.048120764 |
| LTR/Gypsy:LTR81B           | 4.241  | 4.258  | 4.541  | 4.65   | 0.046452142 |
| DNA/TcMar:DNA1_Mam         | 2.046  | 2.869  | 4.165  | 4.593  | 0.042573281 |
| LTR/ERVL:MER70B            | 3.269  | 3.411  | 3.795  | 4.044  | 0.04056836  |
| LTR/ERVK:RLTR19B           | 2.538  | 2.921  | 4.584  | 4.005  | 0.029627935 |
| LTR/ERV1:RLTR30D_RN        | 1.271  | 1.261  | 3.689  | 3.127  | 0.041478518 |
| LTR/ERVK:ERVB5_1-I_MM      | 1.014  | 0.563  | 2.776  | 2.348  | 0.014781246 |
| LTR/ERVK:ERVB4_3-I_MM      | 1.052  | 0.957  | 1.614  | 1.812  | 0.02470933  |
| LTR/ERVL:LTR69             | 1.176  | 1.089  | 1.419  | 1.318  | 0.036808296 |

|                         |       |        |        |        |             |
|-------------------------|-------|--------|--------|--------|-------------|
| LTR/ERVK:MMERVK10D3_LTR | 0.604 | 0.897  | 1.482  | 1.214  | 0.047928931 |
| LTR/Gypsy:LTR81AB       | 0.189 | 0.107  | 0.526  | 0.651  | 0.019217846 |
| LTR/ERVK:RLTR13D        | 0.272 | 0.197  | 0.484  | 0.41   | 0.028167049 |
| LTR/ERV1-MaLR:MLT1H-int | 21.11 | 19.514 | 12.639 | 13.157 | 0.023990743 |
| LTR/ERVK:IAPA_MM-int    | 1.659 | 2.003  | 1.116  | 0.799  | 0.032735721 |
| LTR/ERV1:RLTR1E_MM      | 3.713 | 4.176  | 1.57   | 0.754  | 0.022843573 |
| LTR/ERV1-MaLR:MLT1I-int | 1.807 | 1.438  | 0.764  | 0.551  | 0.033808569 |
