# Supplementary material for: Transient DNMT3L Expression Reinforces Chromatin Surveillance to Halt Senescence Progression in Mouse Embryonic Fibroblast
Source: PubMed Central journal article supplement (PMC7064442; doi:10.3389/fcell.2020.00103), 2020-03-04
Supplement: Table_2.pdf [file Table_2.pdf]

**Table S2.** Primer list.

| <b>Primer ID</b>            | <b>5'-3' sequence</b>           |
|-----------------------------|---------------------------------|
| Class I ERV: ERV U3 (F)     | CCC CAA ATG ACC GAG AAA TA      |
| Class I ERV: ERV U3 (R)     | GCG GTT ACA GAA GCG AGA AG      |
| Class I ERV: eMLV (F)       | GTA AAA ACT CCA CAC TCG GC      |
| Class I ERV: eMLV (R)       | ACG ATT CGG ATG CAA ACA GC      |
| ClassII ERV: IAP (F)        | CGT GAG AAC GCG TCG AAT AA      |
| ClassII ERV: IAP (R)        | TTC TGG TTC TGG AAT GAG GG      |
| ClassII ERV: MMERVK-10C (F) | CAA ATA GCC CTA CCA TAT GTC AG  |
| ClassII ERV: MMERVK-10C (R) | GTA TAC TTT CTT CTT CAG GTC CAC |
| ClassIII ERV: Mu-ERV L (F)  | ATC TCC TGG CAC CTG GTA TG      |
| ClassIII ERV: Mu-ERV L (R)  | AGA AGA AGG CAT TTG CCA GA      |
| ClassIII ERV: MAT (F)       | ATG TCT TGG GGA GGA CTG TG      |
| ClassIII ERV: MAT (R)       | AGC CCC AGC TAA CCA GAA CT      |
| Dnmt3l (F)                  | GGA ACTCTCCAGGTGTAC             |
| Dnmt3l (R)                  | GTGTCCATCATCATACAG              |
| Rplp0 (F)                   | ATC TGC TGC ATC TGC TTG         |
| Rplp0 (R)                   | CGA CCT GGA AGT CCA ACT AC      |
| Aplp1(F)                    | GTGGGCGTCTAACCCCTCAC            |
| Aplp1(R)                    | CTGCGGGTCCAGAAGACAG             |
| Dnajc6(F)                   | TGAAAATAAAGGTGCCTCGTCTC         |
| Dnajc6(R)                   | TCAGGTTACTGAATAGCCTCCC          |
| Kcnj4(F)                    | ATGCACGGACACAACCGAAA            |
| Kcnj4(R)                    | CTGGGACTTGTTGCTCAGG             |
| Sim2 (F)                    | CCTTCTGACCACGACGAGATG           |
| Sim2 (R)                    | TCCAAGAAAGAAAGACCGCTCTA         |
| Aplp1 promoter (F)          | CTTCCCCATCCCCAGGAC              |
| Aplp1 promoter (R)          | ACTGTCATTGCTGCTTCTGC            |
| Dnajc6 promoter (F)         | GACCTGGCATTCTGGTGA CT           |
| Dnajc6 promoter (R)         | CAGCTCTATCCCCAACCAAA            |
| Kcnj4 promoter (F)          | CTTGCTTGCCTCTCTCTCT             |
| Kcnj4 promoter (R)          | TTGATGACGGCGTTTGTAA C           |
| Sim2 promoter-exon1(F)      | CGGGTCTGCCATAAACAAAC            |
| Sim2 promoter-exon1 (R)     | GCTTCCTTAGTCCGGTCGTC            |
